# Supplementary material
Source: PubMed Central journal article supplement (PMC8084719)
Supplement: mmc1.pdf [file mmc1.pdf]

## **ISN-GKHA: Structures, organization and services for the management of kidney failure in North and East Asia**

### **Supplementary Tables, Figures, and Appendix**

**Table S1:** Burden and risk factors of chronic kidney disease in North and East Asia.

**Figure S1:** Shortage of kidney failure care providers.

**Figure S2:** Capacity for kidney transplantation based on transplant donor type (A) and the existence of transplant waitlists (B).

**Figure S3:** Barriers to optimal kidney failure care in the North and East Asia region.

**Appendix:** Reference list for annual cost of kidney replacement therapy (for Table 3).

**Table S1: Burden and risk factors of chronic kidney disease in North and East Asia\***<sup>S1 - S5</sup>

| Country           | CKD prevalence %<br>(95% CI) | Death attributed to<br>CKD % (95% CI) | DALYs attributed to<br>CKD % (95% CI) | Obesity %<br>(95% CI) | High BP %<br>(95% CI) | Smoking %<br>(95% CI) |
|-------------------|------------------------------|---------------------------------------|---------------------------------------|-----------------------|-----------------------|-----------------------|
| China             | 9.76 (8.98 - 10.60)          | 1.68 (1.54 - 1.72)                    | 1.32 (1.21 - 1.41)                    | 6.6 (5.1 - 8.4)       | 19.2 (14.9 - 24.0)    | 22.0 (21.6 - 22.4)    |
| Hong Kong (China) | -                            | -                                     | -                                     | 29.9                  | 15.9                  | 14.8                  |
| Japan             | 17.62 (16.43 - 19.08)        | 2.60 (2.48 - 2.79)                    | 1.92 (1.74 - 2.08)                    | 4.4 (3.3 - 5.7)       | 17.6 (14.1 - 21.5)    | 17.2 (16.8 - 17.6)    |
| South Korea       | 10.85 (10.01 - 11.71)        | 2.03 (1.91 - 2.16)                    | 1.40 (1.26 - 1.53)                    | 7.1 (4.2 - 10.6)      | 18.2 (12.7 - 24.9)    | 22.1 (20.5 - 23.7)    |
| Macao (China)     | -                            | -                                     | -                                     | -                     | -                     | -                     |
| Mongolia          | 8.68 (8.00 - 9.39)           | 1.55 (1.43 - 1.84)                    | 1.25 (1.14 - 1.50)                    | 19.6 (15.6 - 23.9)    | 29.0 (22.5 - 35.9)    | 21.7 (19.1 - 24.5)    |
| Taiwan (China)    | 12.20 (11.32 - 13.12)        | 3.75 (3.57 - 3.93)                    | 2.53 (2.30 - 2.72)                    | -                     | -                     | 11.5 (9.8 - 13.4)     |

Abbreviations: CKD: chronic kidney disease; DALYs: disability-adjusted life years; BP: blood pressure; CI: confidence interval

“-“ Data not reported/unavailable

\* Results are expressed as percentage (%) of the population

**Figure S1:** Shortage of kidney failure care providers.

|                          | Nephrologists | Transplant surgeons | Surgeons (HD access) | Surgeons (PD access) | Interventional radiologists (HD access) | Interventional radiologists (PD access) | Laboratory technicians | Dietitians | Radiologists (ultrasound) | Vascular access coordinators | Counsellors/psychologists | Transplant coordinators | Dialysis nurses | Dialysis technicians | TOTAL SHORTAGE |
|--------------------------|---------------|---------------------|----------------------|----------------------|-----------------------------------------|-----------------------------------------|------------------------|------------|---------------------------|------------------------------|---------------------------|-------------------------|-----------------|----------------------|----------------|
| <b>Total shortage →</b>  | 4             | 2                   | 3                    | 4                    | 2                                       | 5                                       | 3                      | 5          | 4                         | 4                            | 4                         | 4                       | 4               | 5                    |                |
| <b>China</b>             |               |                     |                      |                      |                                         |                                         |                        |            |                           |                              |                           |                         |                 |                      | <b>0</b>       |
| <b>Hong Kong (China)</b> |               |                     |                      |                      |                                         |                                         |                        |            |                           |                              |                           |                         |                 |                      | <b>6</b>       |
| <b>Japan</b>             |               |                     |                      |                      |                                         |                                         |                        |            |                           |                              |                           |                         |                 |                      | <b>12</b>      |
| <b>South Korea</b>       |               |                     |                      |                      |                                         |                                         |                        |            |                           |                              |                           |                         |                 |                      | <b>11</b>      |
| <b>Macao (China)</b>     |               |                     |                      |                      |                                         |                                         |                        |            |                           |                              |                           |                         |                 |                      | <b>7</b>       |
| <b>Mongolia</b>          |               |                     |                      |                      |                                         |                                         |                        |            |                           |                              |                           |                         |                 |                      | <b>10</b>      |
| <b>Taiwan (China)</b>    |               |                     |                      |                      |                                         |                                         |                        |            |                           |                              |                           |                         |                 |                      | <b>13</b>      |

Abbreviations: HD: hemodialysis; PD: peritoneal dialysis

Green cells indicate no shortage. Red cells indicate shortage.

|             |
|-------------|
| No shortage |
| Shortage    |

**Figure S2:** Capacity for kidney transplantation based on transplant donor type (A) and the existence of transplant waitlists (B).

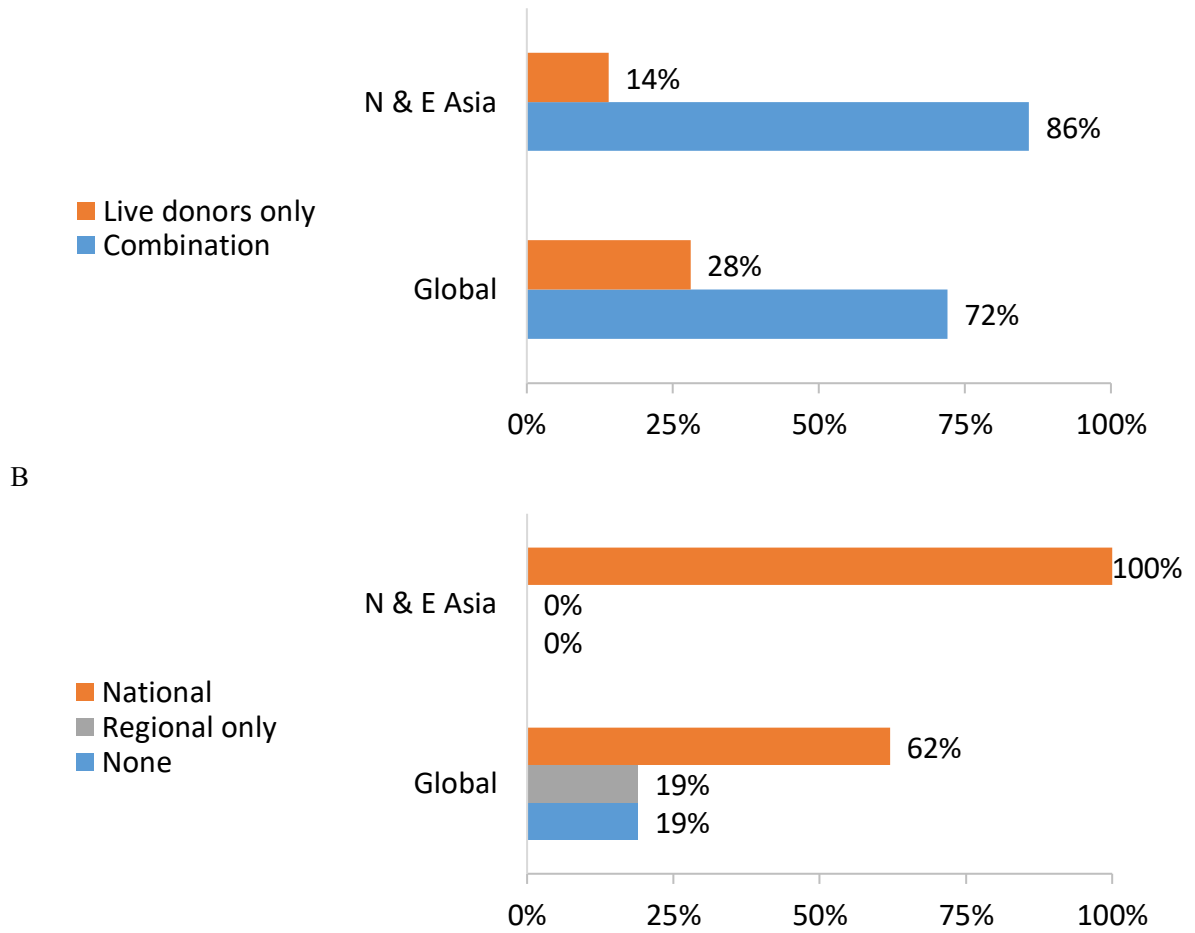

Abbreviations: N & E: North and East

**Figure S3:** Barriers to optimal kidney failure care in the North and East Asia region.

| Country           | Geography  | Physician  | Patient    | Nephrologists | Healthcare system | Lack of political will | Economic factors | Other      | None       |
|-------------------|------------|------------|------------|---------------|-------------------|------------------------|------------------|------------|------------|
| China             | Dark gray  | Dark gray  | Dark gray  | Dark gray     | Dark gray         | Light gray             | Dark gray        | Light gray | Light gray |
| Hong Kong (China) | Light gray | Light gray | Light gray | Light gray    | Dark gray         | Light gray             | Light gray       | Light gray | Light gray |
| Japan             | Dark gray  | Dark gray  | Dark gray  | Dark gray     | Light gray        | Light gray             | Light gray       | Light gray | Light gray |
| South Korea       | Light gray | Light gray | Light gray | Light gray    | Light gray        | Dark gray              | Dark gray        | Light gray | Light gray |
| Macao (China)     | Light gray | Dark gray  | Dark gray  | Light gray    | Dark gray         | Dark gray              | Light gray       | Light gray | Light gray |
| Mongolia          | Dark gray  | Light gray | Light gray | Dark gray     | Light gray        | Light gray             | Dark gray        | Light gray | Light gray |
| Taiwan (China)    | Dark gray  | Dark gray  | Light gray | Light gray    | Light gray        | Light gray             | Light gray       | Light gray | Light gray |

Dark gray indicates yes/present. Light gray indicates no/absent. No shading indicates unknown

### **Supplementary References:**

- S1. Institute for Health Metrics and Evaluation. Global Burden of Disease Study 2017 (GBD 2017) Data Resources. Available at: <http://ghdx.healthdata.org/gbd-2017>. Accessed August 6, 2020
- S2. World Health Organization. The Global Health Observatory. Available at: <https://www.who.int/gho/en/>. Published 2019. Accessed: August 6, 2020.
- S3. Centre for Health Protection (CHP). Obesity. Available at: [https://www.chp.gov.hk/files/pdf/chapter\\_9\\_eng.pdf](https://www.chp.gov.hk/files/pdf/chapter_9_eng.pdf). Accessed: 15<sup>th</sup> August 2020.
- S4. Centre for Health Protection (CHP). High Blood Pressure. Available at: [https://www.chp.gov.hk/files/pdf/chapter\\_9\\_eng.pdf](https://www.chp.gov.hk/files/pdf/chapter_9_eng.pdf). Accessed: 15<sup>th</sup> August 2020.
- S5. Centre for Health Protection (CHP). Smoking. Available at: [https://www.chp.gov.hk/files/pdf/output\\_pamphlet\\_eng\\_4.pdf](https://www.chp.gov.hk/files/pdf/output_pamphlet_eng_4.pdf). Accessed: 15<sup>th</sup> August 2020.

**Appendix:** Reference list for annual cost of kidney replacement therapy (for Table 3) (APA format).

- Fukuhara, S., Yamazaki, C., Hayashino, Y., Higashi, T., Eichleay, M. A., Akiba, T., ... & Kurokawa, K. (2007). The organization and financing of end-stage renal disease treatment in Japan. *International journal of health care finance and economics*, 7(2-3), 217-231.
- Hu, R. H., Lee, P. H., Tsai, M. K., & Lee, C. Y. (1998). Medical cost difference between renal transplantation and hemodialysis. In *Transplantation proceedings* (Vol. 30, No. 7, pp. 3617-3620).
- Kwon, C. H. D., Lee, S. K., & Ha, J. (2011). Trend and outcome of Korean patients receiving overseas solid organ transplantation between 1999 and 2005. *Journal of Korean medical science*, 26(1), 17-21.

- Lee, J., Lee, J. P., Park, J. I., Hwang, J. H., Jang, H. M., Choi, J. Y., ... & Kim, Y. S. (2014). Early nephrology referral reduces the economic costs among patients who start renal replacement therapy: a prospective cohort study in Korea. *PLoS One*, 9(6), e99460.
- Li, P. K., & Chow, K. M. (2001). The cost barrier to peritoneal dialysis in the developing world—an Asian perspective. *Peritoneal Dialysis International*, 21(3\_suppl), 307-313.
- Neil, N., Walker, D. R., Sesso, R., Blackburn, J. C., Tschosik, E. A., Sciaraffia, V., ... & Bhattacharyya, S. K. (2009). Gaining efficiencies: resources and demand for dialysis around the globe. *Value in Health*, 12(1), 73-79.
- Shimizu, U., Saito, S., Lings, Y., Iino, N., James Kazama, J., & Akazawa, K. (2012). Cost-effectiveness achieved through changing the composition of renal replacement therapy in Japan. *Journal of medical economics*, 15(3), 444-453.
- Tumurbaatar, B., Nyamsuren, D., Byambadorj, B., Bayan-Undur, D., Jambaljav, L., Byambadash, B., ... & Ganbold, L. (2012). Kidney transplantation in Mongolia using effective and economical immunosuppression—a three-year experience. *Annals of transplantation*, 17(1), 132-139.
- van der Tol, A., Lameire, N., Morton, R. L., Van Biesen, W., & Vanholder, R. (2019). An international analysis of dialysis services reimbursement. *Clinical Journal of the American Society of Nephrology*, 14(1), 84-93.
- Yu, A. W. Y., Chau, K. F., Ho, Y. W., & Li, P. K. T. (2007). Development of the “peritoneal dialysis first” model in Hong Kong. *Peritoneal dialysis international*, 27(Supplement 2), S53-S55.
